# Supplementary material
Source: HighWire-hosted journal article supplement (https://erj.ersjournals.com/content/53/5/1802203)
Supplement: inline-supplementary-material-1 [file inline-supplementary-material-1.pdf]

**Table E1.** The relationship of capsaicin tussive challenge tests with self-attempted cough suppression with cough severity, urge to cough visual analogue scale, and cough-specific health status in participants with chronic refractor cough

| CS5 (n=30)         |                          |          |
|--------------------|--------------------------|----------|
|                    | Correlation coefficients | p values |
| Cough severity VAS | -0.260                   | 0.173    |
| Urge to cough VAS  | -0.118                   | 0.542    |
| LCQ                |                          |          |
| Physical           | -0.015                   | 0.938    |
| Psychological      | -0.098                   | 0.614    |
| Social             | -0.164                   | 0.395    |
| Total              | -0.094                   | 0.627    |

All correlation coefficients are Spearman's rank correlation

CS5 = capsaicin concentrations to elicit 5 coughs during self-attempted suppression of coughing.

**Table E2.** The sensitivity and specificity of capsaicin cough challenge test thresholds for discriminating patients with chronic refractory cough from healthy subjects

**a) Cough suppression test (CS5)**

| Thresholds $\mu\text{mol.L}^{-1}$ | Sensitivity (%) | Specificity (%) |
|-----------------------------------|-----------------|-----------------|
| 999.93                            | 100.00          | 26.09           |
| 867.36                            | 100.00          | 39.13           |
| 585.04                            | 100.00          | 43.48           |
| 407.20                            | 100.00          | 47.83           |
| 314.58                            | 100.00          | 52.17           |
| 244.18                            | 100.00          | 56.52           |
| 218.41                            | 100.00          | 60.87           |
| 164.67                            | 100.00          | 65.22           |
| 125.13                            | 100.00          | 69.57           |
| 96.83                             | 100.00          | 73.91           |
| 68.38                             | 100.00          | 78.26           |
| 56.83                             | 100.00          | 82.61           |
| 45.27                             | 100.00          | 86.96           |

|       |        |       |
|-------|--------|-------|
| 38.86 | 100.00 | 91.30 |
| 37.13 | 96.67  | 91.30 |
| 34.23 | 93.33  | 91.30 |
| 31.92 | 90.00  | 91.30 |
| 30.68 | 86.67  | 91.30 |
| 29.92 | 83.33  | 91.30 |
| 24.70 | 83.33  | 95.65 |
| 19.34 | 80.00  | 95.65 |
| 18.56 | 76.67  | 95.65 |
| 16.85 | 73.33  | 95.65 |
| 15.58 | 70.00  | 95.65 |
| 14.73 | 66.67  | 95.65 |
| 13.89 | 63.33  | 95.65 |
| 12.37 | 60.00  | 95.65 |
| 10.21 | 56.67  | 95.65 |
| 8.09  | 53.33  | 95.65 |

---

|      |       |        |
|------|-------|--------|
| 6.40 | 50.00 | 95.65  |
| 5.85 | 50.00 | 100.00 |
| 5.30 | 46.67 | 100.00 |
| 4.15 | 43.33 | 100.00 |
| 2.57 | 40.00 | 100.00 |
| 1.91 | 36.67 | 100.00 |
| 1.80 | 33.33 | 100.00 |
| 1.59 | 30.00 | 100.00 |
| 1.36 | 26.67 | 100.00 |
| 1.13 | 23.33 | 100.00 |
| 0.94 | 20.00 | 100.00 |
| 0.86 | 16.67 | 100.00 |
| 0.77 | 13.33 | 100.00 |
| 0.63 | 10.00 | 100.00 |
| 0.51 | 6.67  | 100.00 |

**b) Standard capsaicin challenge test (C5)**

| Thresholds $\mu\text{mol.L}^{-1}$ | Sensitivity (%) | Specificity (%) |
|-----------------------------------|-----------------|-----------------|
| 594.77                            | 100.00          | 8.33            |
| 352.98                            | 100.00          | 16.67           |
| 95.89                             | 100.00          | 25.00           |
| 71.45                             | 100.00          | 33.33           |
| 60.18                             | 100.00          | 41.67           |
| 49.54                             | 100.00          | 50.00           |
| 36.91                             | 100.00          | 58.33           |
| 31.17                             | 90.91           | 58.33           |
| 23.82                             | 81.82           | 58.33           |
| 16.41                             | 81.82           | 66.67           |
| 14.13                             | 81.82           | 75.00           |
| 13.09                             | 81.82           | 83.33           |
| 12.59                             | 81.82           | 91.67           |
| 12.20                             | 72.73           | 91.67           |
| 11.98                             | 63.64           | 91.67           |

|      |       |        |
|------|-------|--------|
| 9.87 | 63.64 | 100.00 |
| 7.09 | 54.55 | 100.00 |
| 4.87 | 45.45 | 100.00 |
| 2.17 | 36.36 | 100.00 |
| 0.79 | 27.27 | 100.00 |
| 0.54 | 18.18 | 100.00 |
| 0.45 | 9.09  | 100.00 |
